# Supplementary material for: Facile, air-insensitive solvothermal synthesis of emission-tunable CuInS2/ZnS quantum dots with high quantum yields
Source: Royal Society of Chemistry journal article supplement (doi:10.1039/c1jm12437d), 2011-01-01
Supplement: c1jm12437d.pdf [file c1jm12437d.pdf]

# Facile, air-insensitive solvothermal synthesis of emission-tunable CuInS<sub>2</sub>/ZnS quantum dots with high quantum yields

Da-Eun Nam, Woo-Seuk Song, Heesun Yang\*

*Department of Materials Science and Engineering, Hongik University, Seoul 121-791, Republic of Korea*

\*Address correspondence to: hyang@hongik.ac.kr

For comparison of crystal structure, CIS QDs with a stoichiometric composition (i.e., Cu/In=1) have been separately prepared by the same solvothermal condition. Using a Rigaku Ultima IV diffractometer with Cu K<sub>α</sub> radiation source, the X-ray diffraction (XRD) pattern of CIS QDs with a Cu-deficient composition (i.e., Cu/In=0.5) was collected and compared with that of those with a stoichiometric composition. As shown in Fig. S1, the CIS QDs with Cu/In molar ratios of 1 and 0.5 exhibited almost identical diffraction patterns of tetragonal chalcopyrite structure, indicating that our Cu-deficient CIS QDs still possessed chalcopyrite frame.

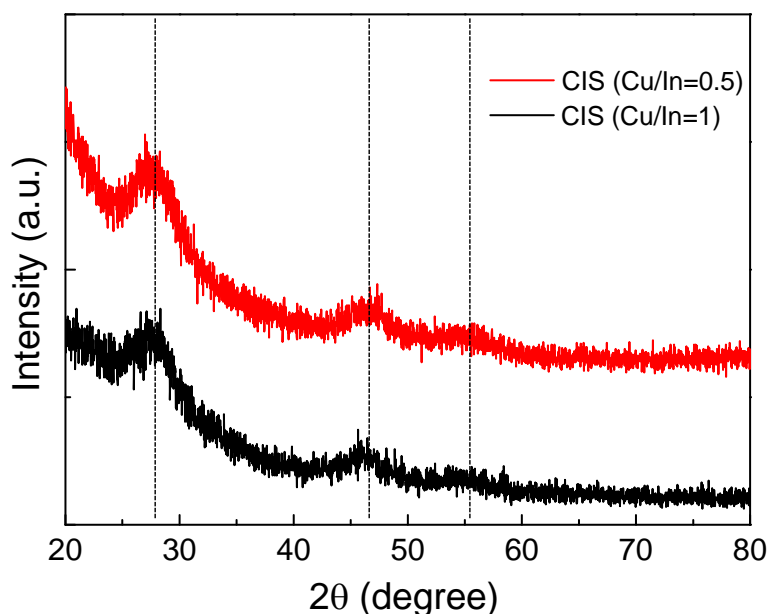

**Fig. S1** Comparison of XRD patterns of off-stoichiometric (Cu/In=0.5) and stoichiometric (Cu/In=1) CIS QDs.
